# Supplementary material for: Do Immediate Gains Predict Long-Term Symptom Change? Findings from a Randomized Trial of a Single-Session Intervention for Youth Anxiety and Depression
Source: Springer Nature journal article supplement (doi:10.1007/s10578-019-00889-2), 2019-04-16
Supplement: MOESM2 [file 16661538]

Supplemental Table 1. Results of mixed linear models predicting 9-month change over time in parent-reported youth depression and anxiety symptoms from immediate changes in mindset, perceived primary control, and perceived secondary control. Table 3. Results of mixed effects linear models predicting change across the 9-month follow-up period in youth depressive and anxiety symptoms from immediate, post-intervention changes in growth mindset, perceived primary control, and perceived secondary control. Both models use FIML estimation. Models include assessments of parent-reported outcomes at all follow-up points (3-, 6-, and 9-months post-SSI). + *p* < .10, **p* < .05, ***p* < .01. PCSC = primary control scale for children; SCSC = secondary control scale for children. Larger, more positive residualized change scores were calculated to indicate greater immediate pre-to-post-interventions improvement in a given variable.

|  | Youth depression (CDI-P) | | | Youth anxiety (SCARED-P) | | |
| --- | --- | --- | --- | --- | --- | --- |
|  | *B* | SE | *p* | *B* | SE | *p* |
| Intercept | 16.84 | 5.67 | 0.004 | 31.20 | 9.93 | 0.002 |
| Time | -0.74 | 0.24 | 0.003 | -2.08 | 0.35 | < 0.001 |
| Age | -0.11 | 0.68 | 0.88 | 0.08 | 1.16 | 0.94 |
| Female (vs. male) | 2.71 | 5.32 | 0.51 | 2.37 | 9.37 | 0.80 |
| Dual- vs. single-parent home | -2.72 | 1.79 | 0.13 | 0.79 | 3.03 | 0.79 |
| Family income | -0.02 | 0.34 | 0.94 | -0.89 | 0.58 | 0.13 |
| Mindset intervention condition (vs. comparison condition) | -2.55 | 1.72 | -1.48 | 0.06 | 3.02 | 0.99 |
| Immediate change – Mindset | -1.55 | 1.01 | 0.13 | -0.35 | 1.73 | 0.84 |
| Immediate change – Primary Control | 0.96 | 0.99 | 0.34 | 1.68 | 1.68 | 0.32 |
| Immediate change – Secondary Control | -0.34 | 0.86 | 0.69 | -1.44 | 1.46 | 0.33 |
| Time * Immediate change – Mindset | -0.38 | 0.28 | 0.18 | -0.63 | 0.40 | 0.12 |
| Time * Immediate change – Primary Control | 0.09 | 0.30 | 0.77 | -0.09 | 0.42 | 0.82 |
| Time * Immediate change – Secondary Control | 0.06 | 0.25 | 0.80 | -0.33 | 0.35 | 0.34 |
